# Supplementary material for: Electrocatalytic dihydrogen evolution mechanism of [Fe2(CO)4(κ2-Ph2PCH2CH2PPh2)(μ-S(CH2)3S)] and related models of the [FeFe]-hydrogenases active site: a DFT investigation
Source: Royal Society of Chemistry journal article supplement (doi:10.1039/b926040d), 2010-01-01

## Electronic Supplementary information for the paper:

### Electrocatalytic dihydrogen evolution mechanism of $[\text{Fe}_2(\text{CO})_4(\kappa^2\text{-Ph}_2\text{PCH}_2\text{CH}_2\text{PPh}_2)(\mu\text{-S}(\text{CH}_2)_3\text{S})]$ and related models of the [FeFe]-hydrogenases active site: a DFT investigation

Claudio Greco<sup>a#</sup>, Piercarlo Fantucci<sup>a</sup>, Luca De Gioia<sup>a#</sup>

a) *Department of Biotechnology and Biosciences, University of Milano-Bicocca, Piazza della Scienza 2 20126-Milan (Italy).*

Ricardo Suarez-Bertoa<sup>b</sup>, Maurizio Bruschi<sup>b</sup>

b) *Department of Environmental Science, University of Milano-Bicocca, Piazza della Scienza 1 20126-Milan (Italy).*

Jean Talarmin<sup>c</sup>, Philippe Schollhammer<sup>c</sup>

c) *UMR CNRS 6521, Chimie, Electrochimie Moléculaires et Chimie Analytique, Université de Bretagne Occidentale, 6 Av. V. Le Gorgeu, CS 93837, 29238 Brest Cedex 3, France*

<sup>#</sup>Corresponding authors: [luca.degioia@unimib.it](mailto:luca.degioia@unimib.it), Tel. +390264483463

[claudio.greco@unimib.it](mailto:claudio.greco@unimib.it), Tel.: +390264483473

**Figure S1.** Optimized geometries of monoprotonated hexacarbonyl complexes. All distances in Å

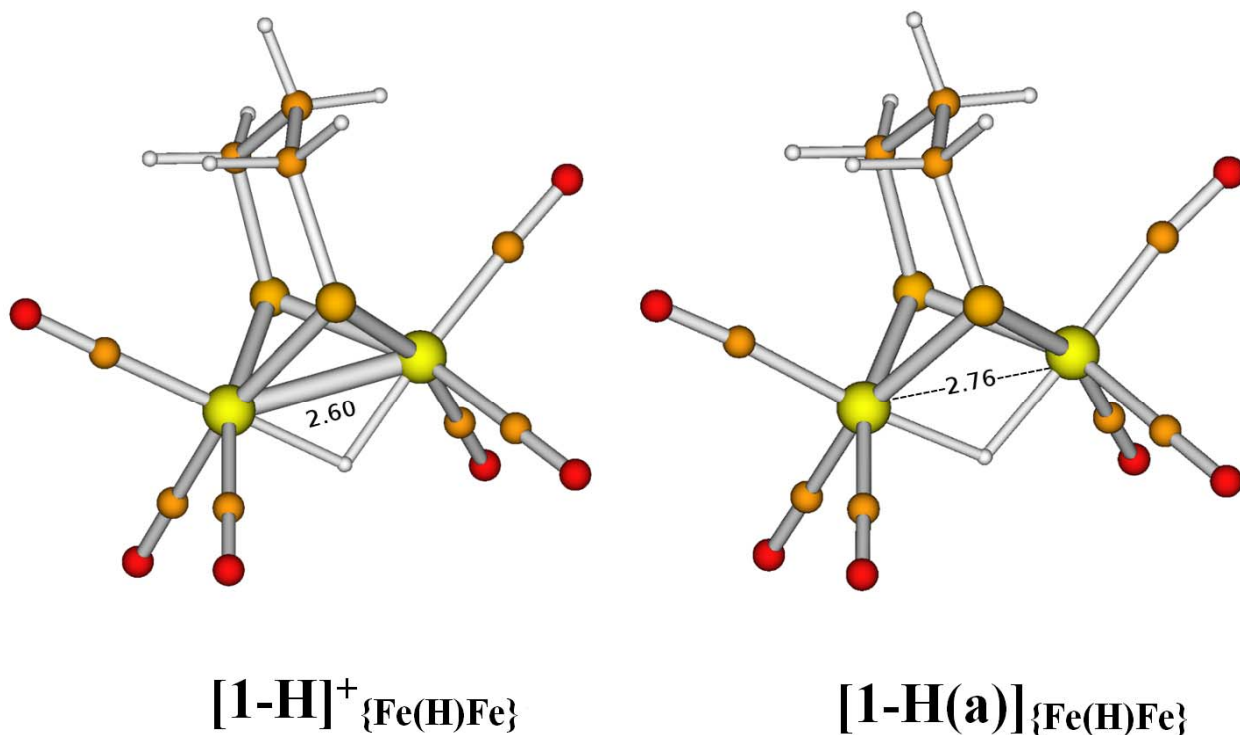

**Figure S2.** Optimized geometries of monoprotonated pentaphosphine complexes. All distances in Å

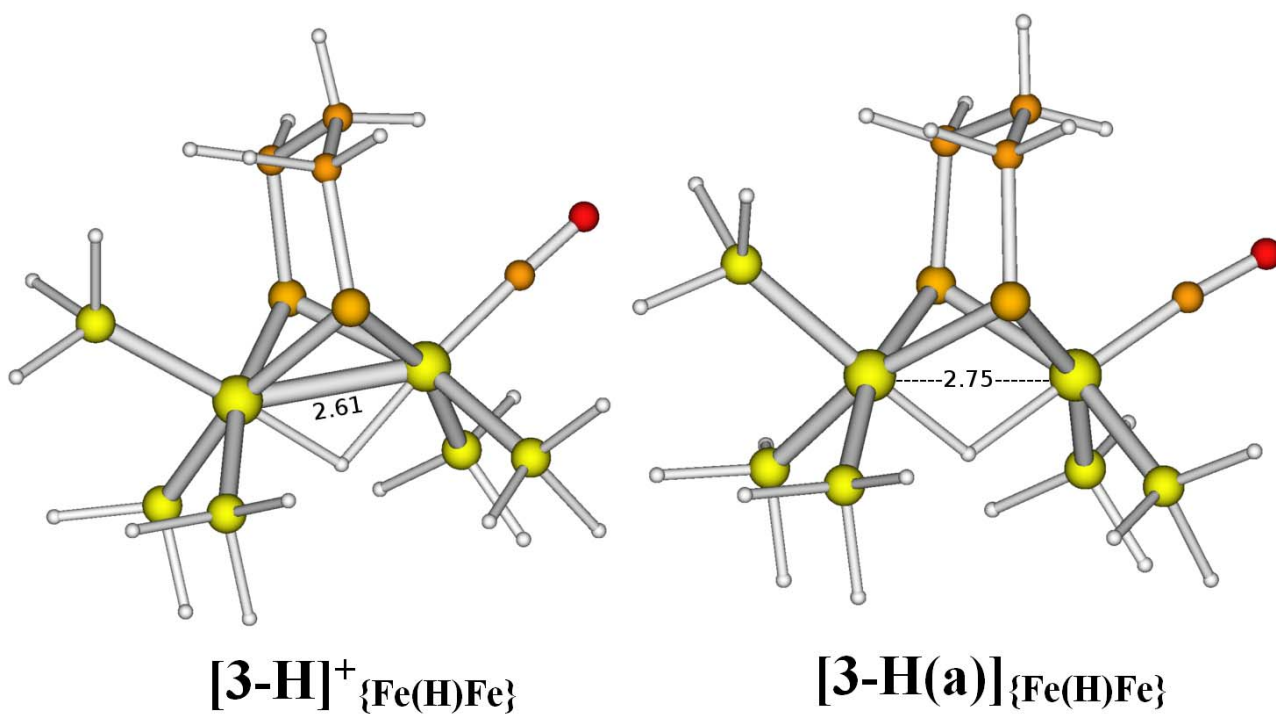

**Figure S3.** Optimized geometries of monoprotonated complexes including dppe and propanediselenolate (pds). All distances in Å

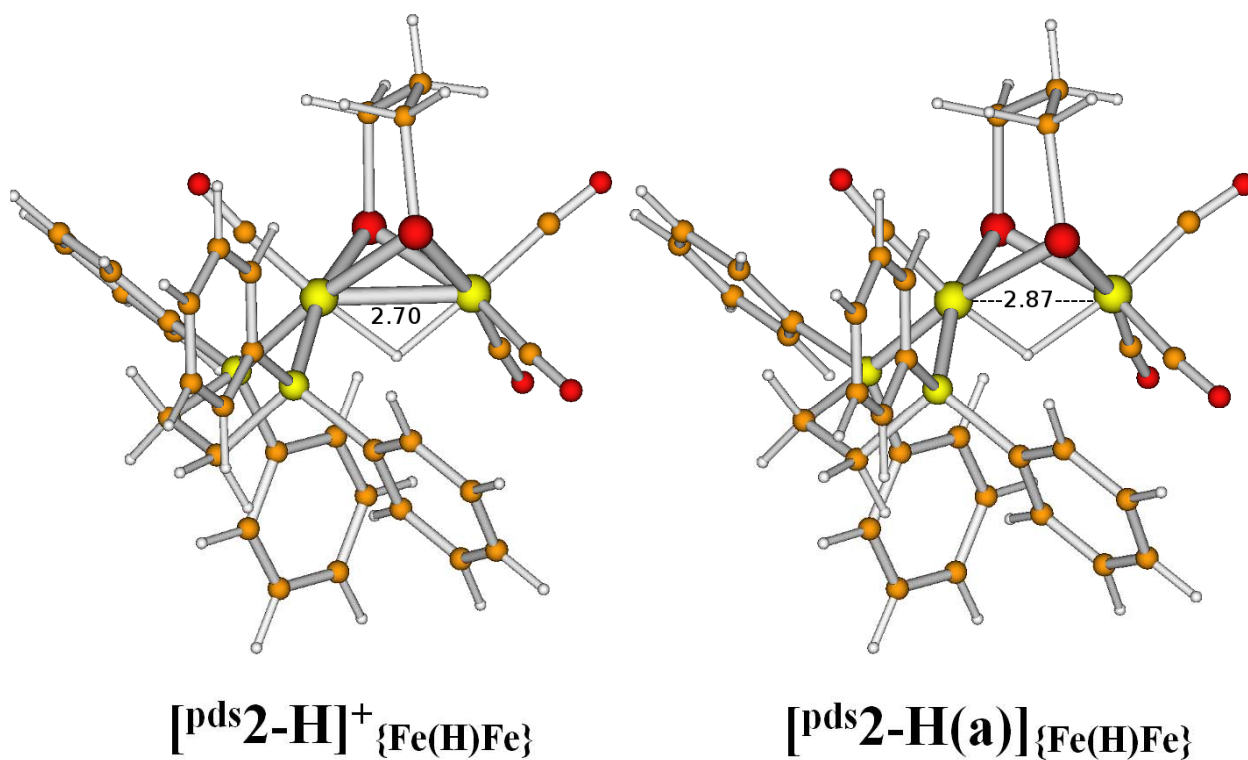

**Figure S4.** Optimized geometries of selected diprotonated cationic complexes. All distances in Å.

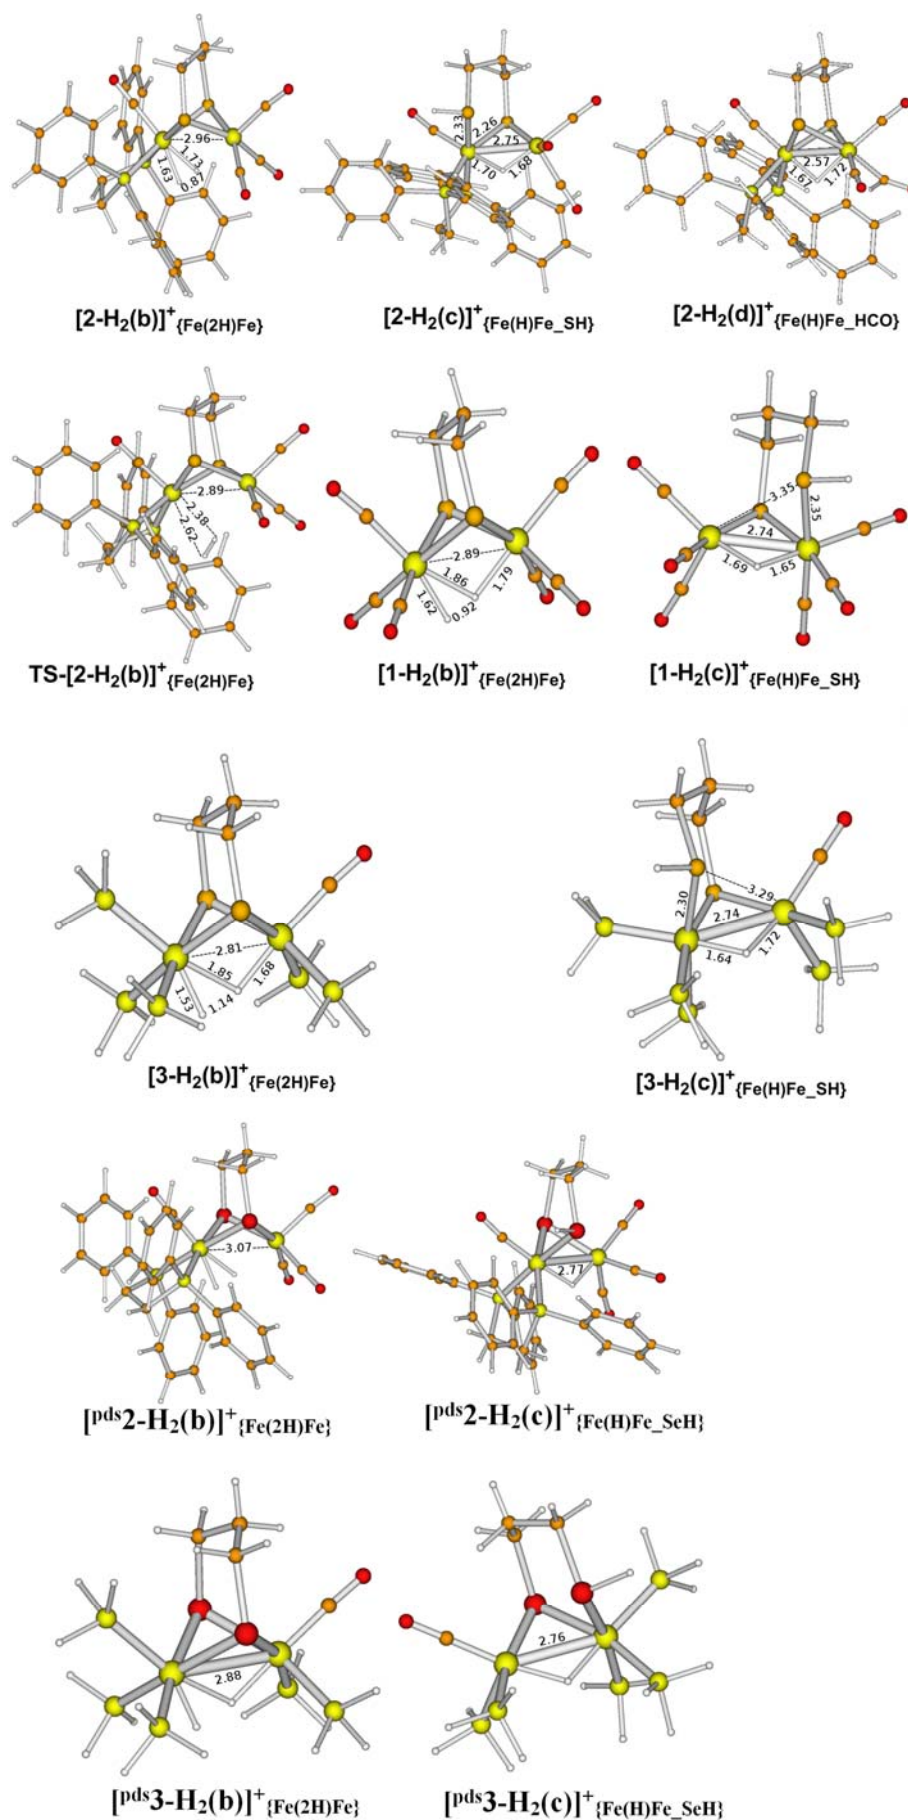

**Figure S5.** Optimized geometries of selected diprotonated neutral complexes. All distances in Å.

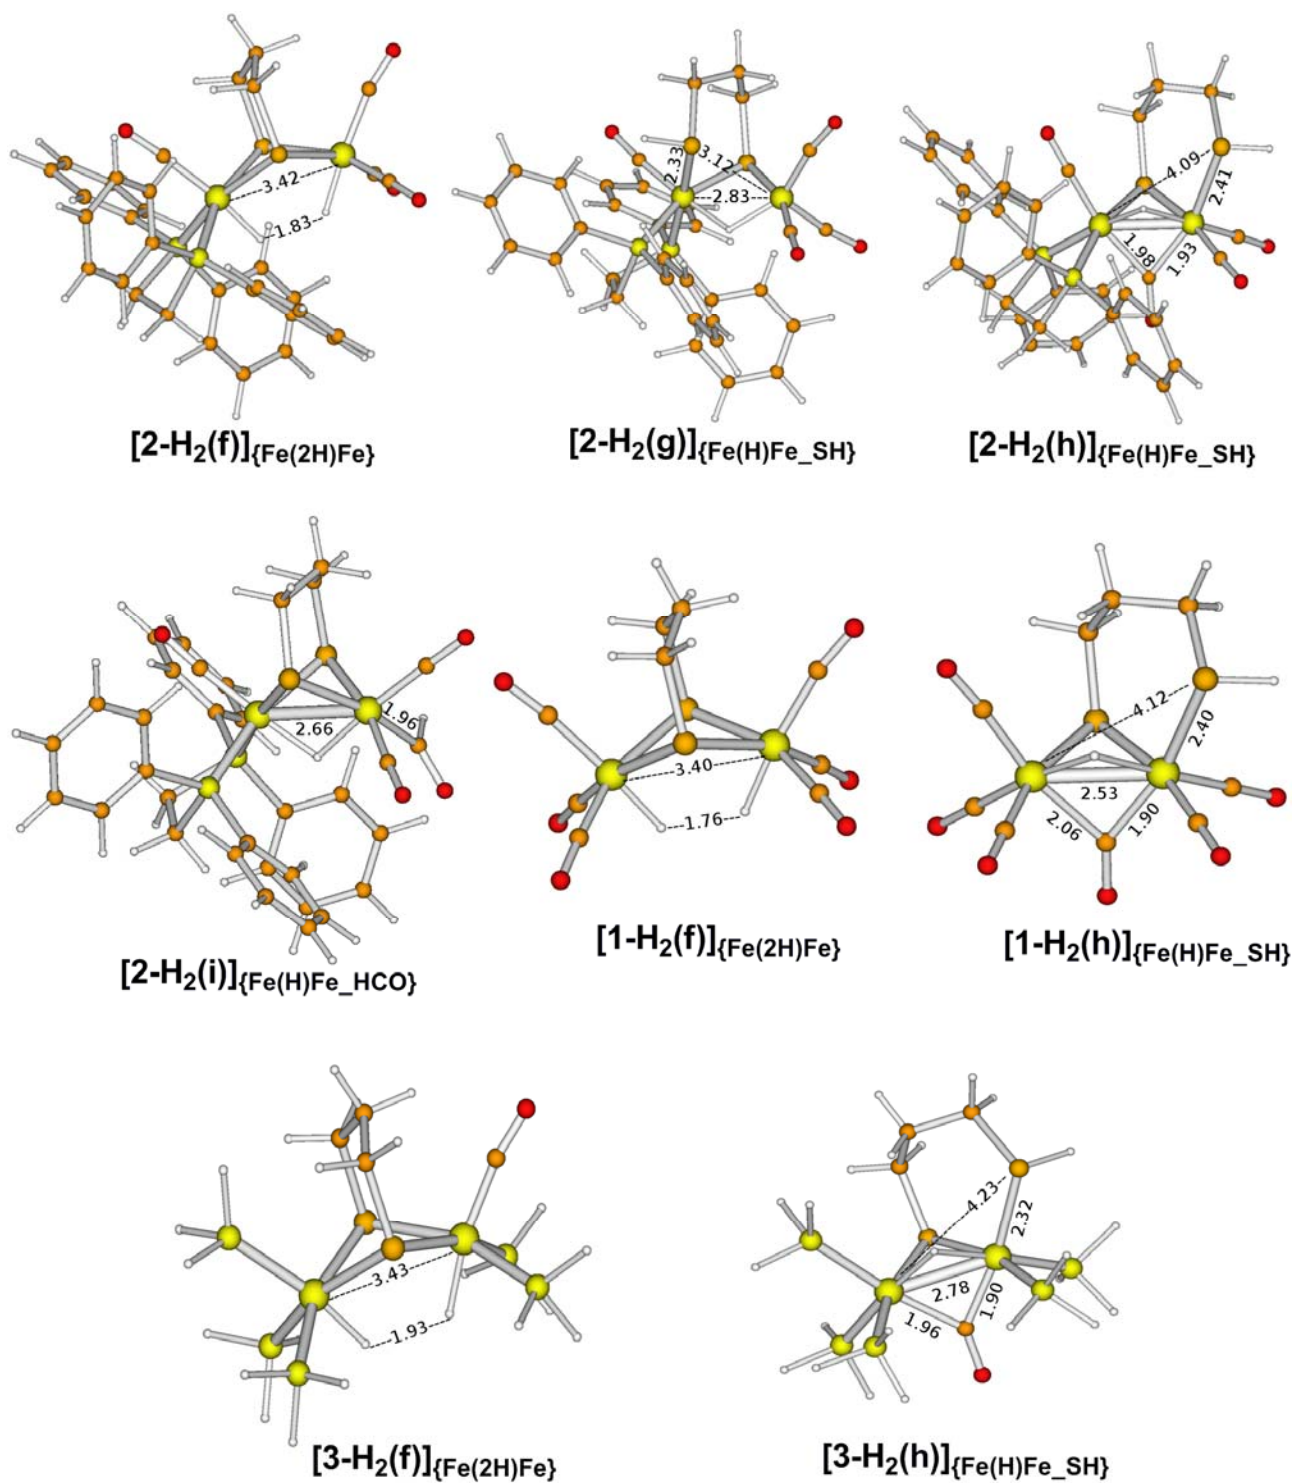

**Figure S6.** Optimized geometries of selected diprotonated anionic complexes. All distances in Å.

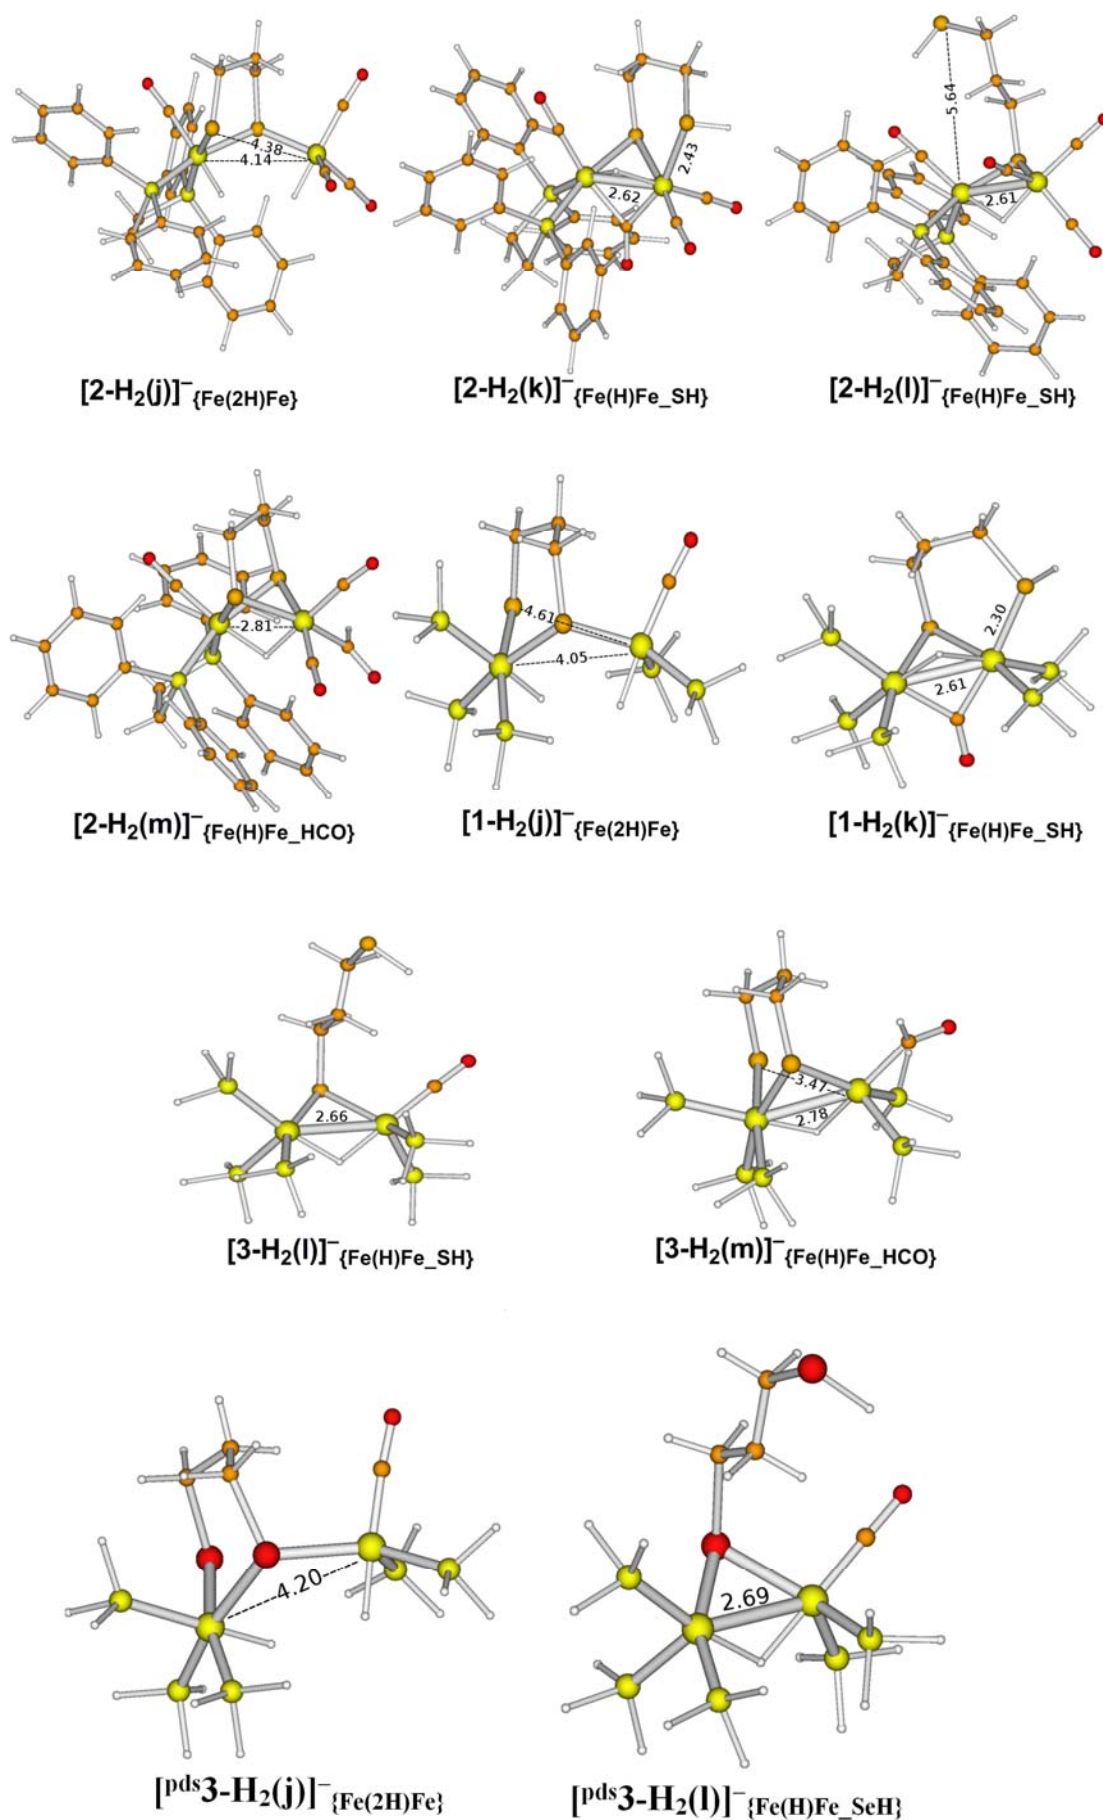

**Figure S7.** Optimized geometries of selected triprotonated cationic complexes. All distances in Å.

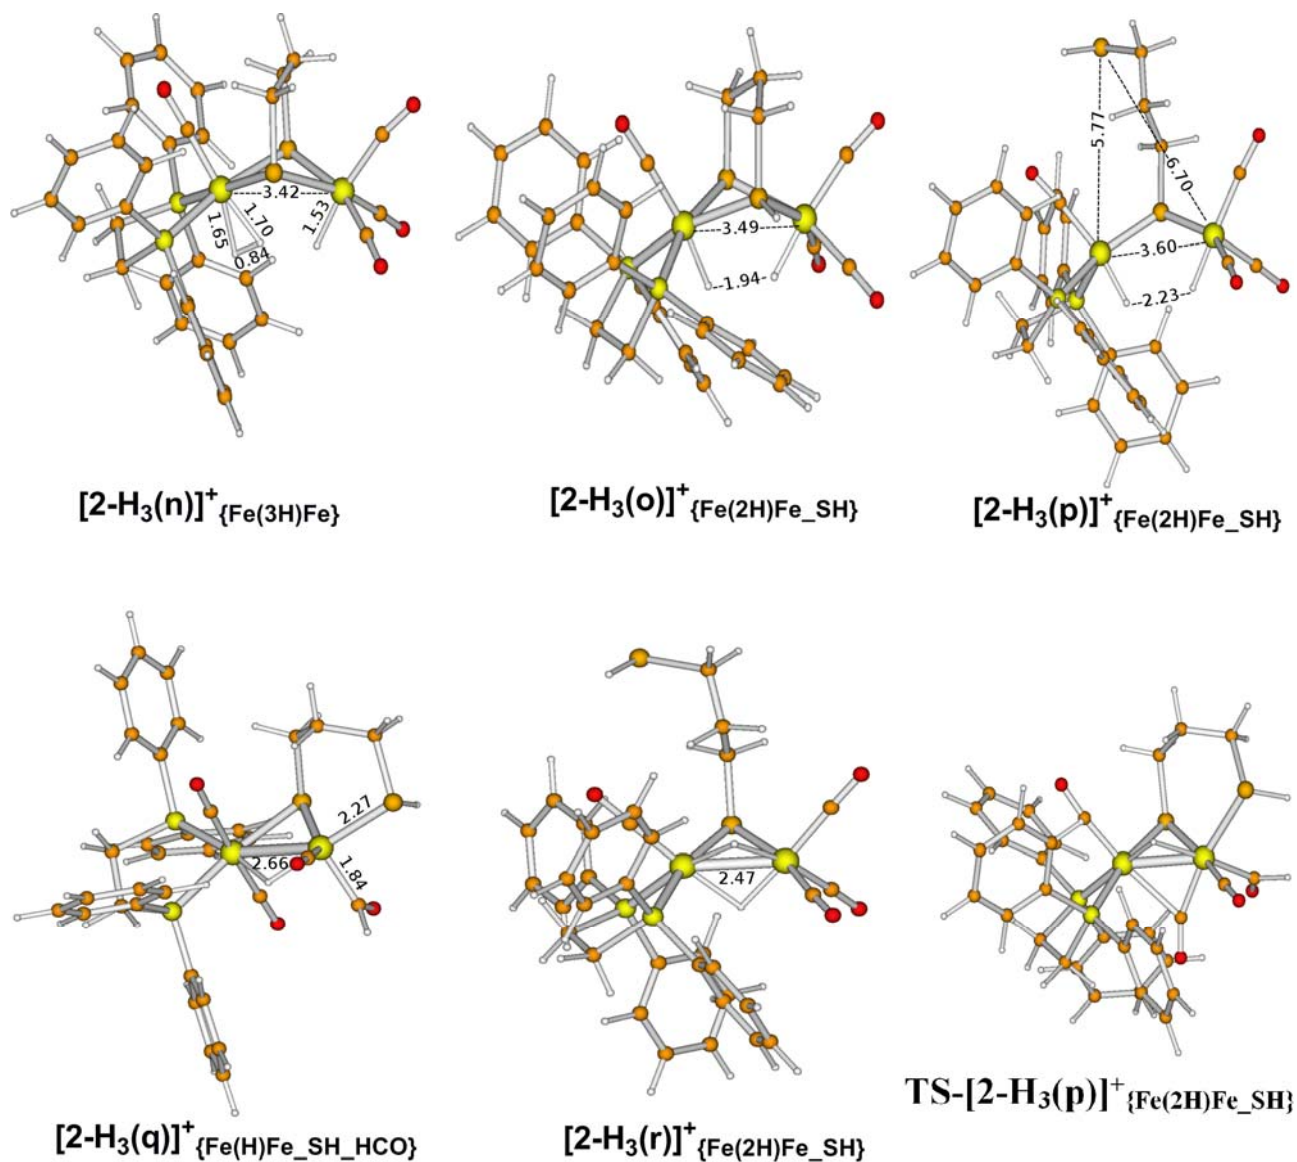



**Figure S8.** Optimized geometries of selected triprotonated neutral complexes. All distances in Å.

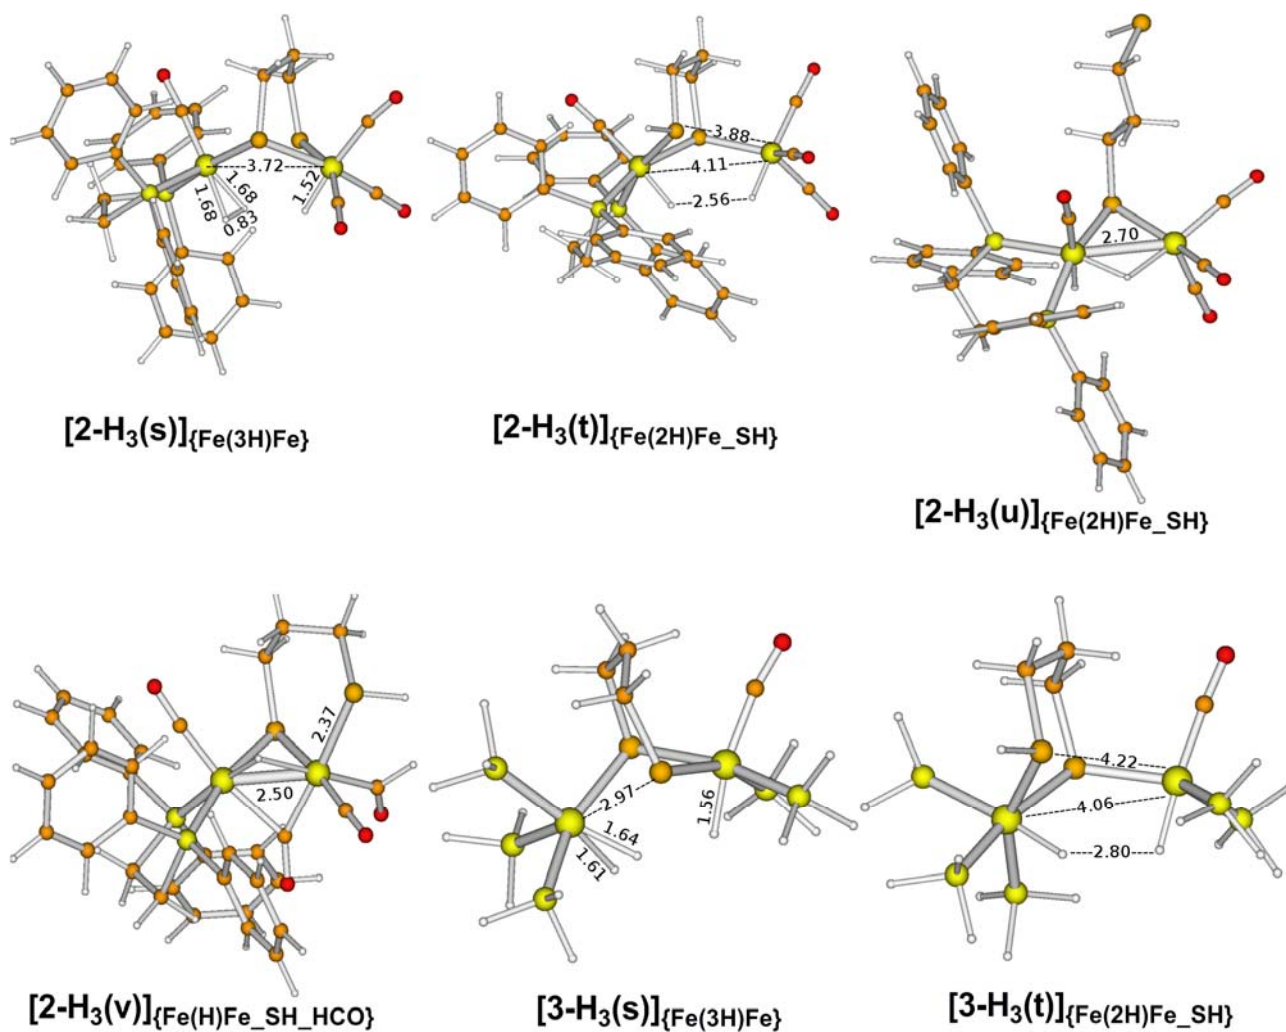

Supplement: b926040d.pdf [file b926040d.pdf]
